# Supplementary material for: Evidence for the role of organic layers in photoconductivity of organic/inorganic hybrid nanosheets as prepared by Langmuir–Blodgett methods
Source: Royal Society of Chemistry journal article supplement (doi:10.1039/b419064e), 2005-01-01
Supplement: b419064e2.pdf [file b419064e2.pdf]

## Supporting data 2

### DC measurements results

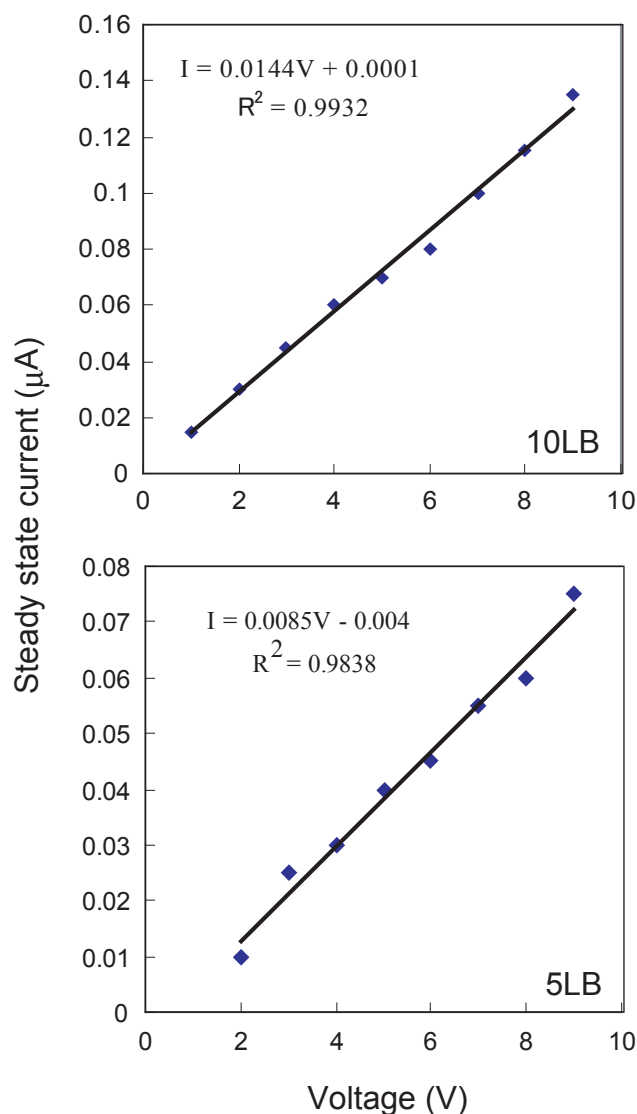

Results of DC measurements of 10- and 5-layered LB films after the photo-modification where the AC plots stayed constant. The Ohmic current was obtained in the 0-10 voltage region. The resistivity of  $69 \text{ M}\Omega$  (10-layered LB film) and  $125 \text{ M}\Omega$  (5-layered LB films) coincided well with the R components in the AC measurements.
