# Supplementary material for: Evidence for the role of organic layers in photoconductivity of organic/inorganic hybrid nanosheets as prepared by Langmuir–Blodgett methods
Source: Royal Society of Chemistry journal article supplement (doi:10.1039/b419064e), 2005-01-01
Supplement: b419064e3.pdf [file b419064e3.pdf]

# Supporting data 3

## Results of GCMS

Blanc measurement

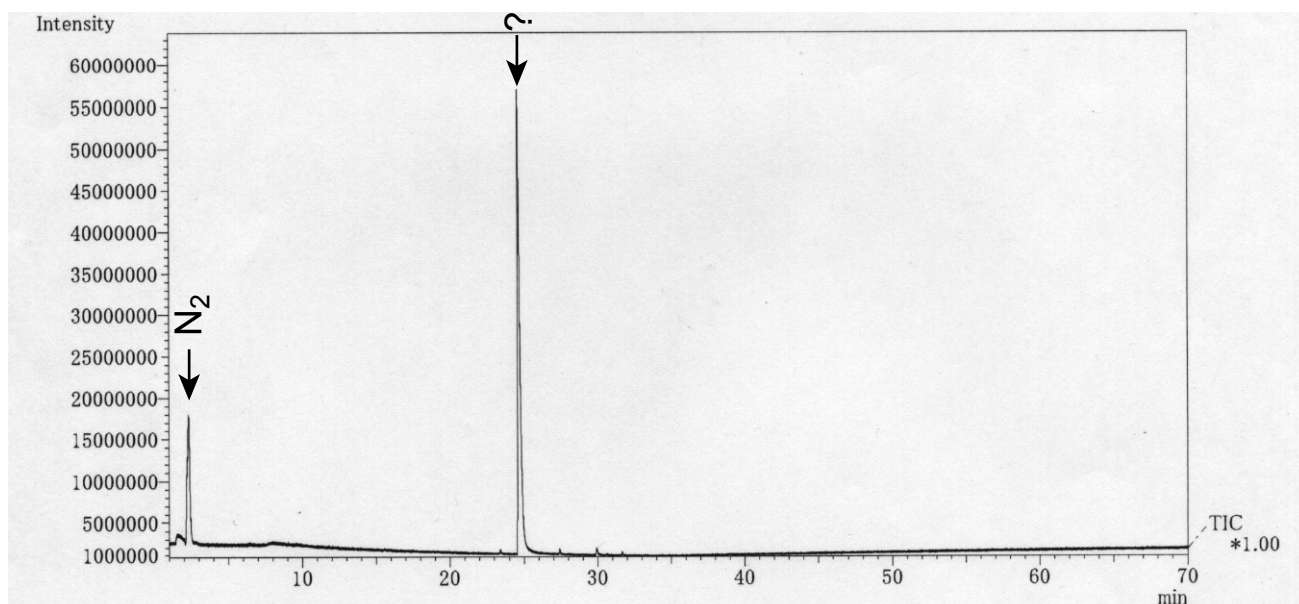

Sample measurement

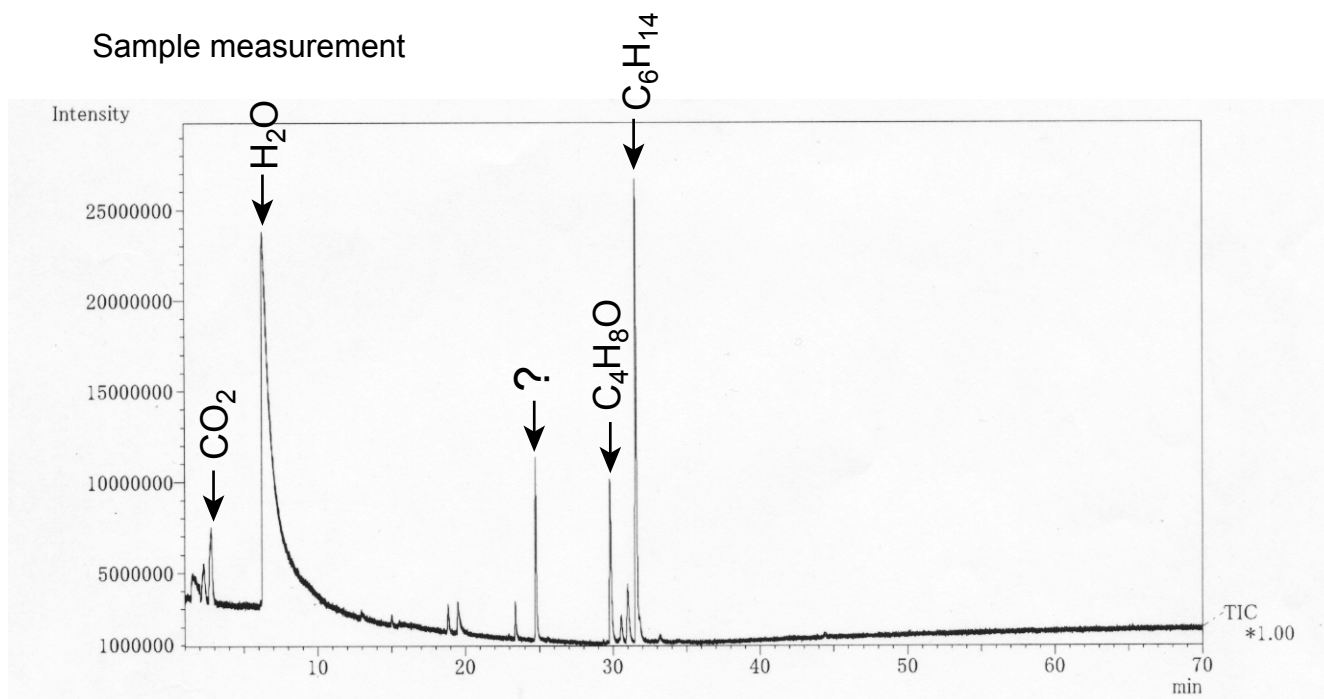

Results of GCMS measurements. As a sample, c.a. 5 mg of ODAH+/niobate in a quartz cell was photo-modified for 8 hours. The outgoing gas was trapped at 77 K. As a reference, an empty quartz cell was irradiated by a Xe-lamp under the same conditions. The upper and lower figures are for the reference and the sample, respectively. The peak indicated by a question mark might involve compounds containing nitrogen such as nitromethane.
